# Supplementary material for: Drug screening on Hutchinson Gilford progeria pluripotent stem cells reveals aminopyrimidines as new modulators of farnesylation
Source: PubMed Central journal article supplement (PMC5399184; doi:10.1038/cddis.2015.374), 2016-02-18
Supplement: cddis2015374x8.pdf [file cddis2015374x8.pdf]

Blondel et al Sup Table 1

| SAMPLE_NAME | SAMPLE_ALIAS      | % prelamin A positive nuclei | Toxicity | Comments                             |
|-------------|-------------------|------------------------------|----------|--------------------------------------|
| C280028-A   | OIPZ1107209       | 92,6                         | -22,5    | SCM                                  |
| C245161-A   | OIPZ1113672       | 90,8                         | -15,9    | IS                                   |
| C245805-A   | OIPZ1140534       | 77,3                         | -13,8    | Di-AP1                               |
| C245827-A   | OIPZ1140005       | 64,3                         | -11,1    | Di-AP2                               |
| C283051-A   | P1300371          | 62,5                         | 11,1     | QC2                                  |
| C249098-A   | OIPZ1206803       | 55,7                         | -20,9    | False positive                       |
| C285357-A   | ICC109-L-004-E02- | 54,2                         | -16,4    | Weak effect                          |
| C286653-A   | ICC121-L-020-G02- | 52,5                         | -3,2     | False positive                       |
| C285129-A   | ICC115-L-001-F02- | 50,6                         | -15,9    | False positive                       |
| C280316-A   | OIPZ1129985       | 47,8                         | -18,6    | Mono-AP3                             |
| C247138-A   | OIPZ1144244       | 47,7                         | 1,5      | Mono-AP1                             |
| C283057-A   | P1300051          | 41,7                         | 0,0      | QC1                                  |
| C000098-B   | Prestw-98         | 40,7                         | -11,2    | False positive                       |
| C282281-A   | P1304433          | 38,9                         | -19,8    | False positive                       |
| C248364-A   | OIPZ1216843       | 37,7                         | -6,9     | Weak effect                          |
| C249178-A   | OIPZ1206608       | 37,6                         | -23,6    | False positive                       |
| C248324-A   | OIPZ1217316       | 37,6                         | -3,9     | False positive                       |
| C000246-B   | Prestw-246        | 35,1                         | -15,0    | False positive                       |
| C281293-A   | P1300211          | 34,3                         | -24,4    | False positive                       |
| C246971-A   | OIPZ1206136       | 34,3                         | -22,0    | False positive                       |
| C281361-A   | OIPZ1216844       | 34,1                         | -16,1    | Toxic at the efficient concentration |
| C000179-B   | Prestw-179        | 33,1                         | -15,1    | False positive                       |
| C000019-B   | Prestw-19         | 33                           | -19,7    | False positive                       |
| C000257-B   | Prestw-257        | 32,2                         | -0,5     | False positive                       |
| C000859-B   | Prestw-859        | 31,9                         | -14,7    | False positive                       |
| C280274-A   | OIPZ1128917       | 30,8                         | -25,3    | False positive                       |
| C280034-A   | OIPZ1107354       | 30,8                         | -23,6    | False positive                       |
| C000244-B   | Prestw-244        | 30,5                         | -16,0    | False positive                       |
| C248859-A   | OIPZ1254447       | 30,2                         | -15,1    | Mono-AP2                             |
| C291907-A   | ICC113-L-139-F10- | 29,7                         | -3,7     | Tetra-AP                             |
| C248920-A   | OIPZ1216298       | 28,8                         | -13,4    | False positive                       |
| C280079-A   | OIPZ1107239       | 28,5                         | -7,3     | False positive                       |
| C246442-A   | OIPZ1204775       | 28,4                         | -20,3    | False positive                       |
| C248321-A   | OIPZ1217317       | 27,2                         | -29,3    | False positive                       |
| C248966-A   | OIPZ1214437       | 27,1                         | -20,7    | False positive                       |
| C281046-A   | OIPZ1244954       | 26,9                         | -19,0    | False positive                       |
| C280022-A   | OIPZ1107349       | 26,8                         | -29,8    | False positive                       |
| C280242-A   | OIPZ1124482       | 26,8                         | -24,0    | False positive                       |
| C280026-A   | OIPZ1107358       | 26,8                         | -19,4    | False positive                       |
| C281030-A   | OIPZ1243883       | 26,6                         | -16,5    | False positive                       |
| C248963-A   | OIPZ1216398       | 26,5                         | -11,2    | False positive                       |
| C279491-A   | OIPZ1119213       | 26,4                         | -28,8    | False positive                       |
| C280276-A   | OIPZ1129031       | 26                           | -25,4    | False positive                       |
| C281016-A   | OIPZ1243988       | 25,9                         | -16,5    | False positive                       |
| C248325-A   | OIPZ1217315       | 25,8                         | -21,0    | False positive                       |
| C280261-A   | OIPZ1124346       | 25,3                         | -21,6    | False positive                       |
| C280263-A   | OIPZ1124437       | 25,2                         | -20,1    | False positive                       |
| C248965-A   | OIPZ1214422       | 25                           | -16,0    | False positive                       |
| C248947-A   | OIPZ1216501       | 25                           | -11,0    | False positive                       |
| C248336-A   | OIPZ1217291       | 24,1                         | -8,9     | False positive                       |
| C000865-B   | Prestw-865        | 24,1                         | -20,0    | SIMVA                                |
| C248968-A   | OIPZ1214419       | 24                           | -24,5    | False positive                       |
| C248384-A   | OIPZ1219493       | 23,7                         | -11,5    | False positive                       |
| C248969-A   | OIPZ1214434       | 23,4                         | -12,1    | False positive                       |
| C282519-A   | P1304054          | 22,5                         | -19,1    | False positive                       |
| C248090-A   | OIPZ1235955       | 22,4                         | -17,1    | False positive                       |
| C247253-A   | OIPZ1224777       | 21,2                         | -20,8    | False positive                       |
| C246441-A   | OIPZ1204751       | 20,8                         | -16,9    | False positive                       |
| C245744-A   | OIPZ1129381       | 19,4                         | -17,9    | False positive                       |

Primary hit eliminated after dose response analysis  
Hits
